# Supplementary material for: Highly efficient degradation of dye pollutants by Ce-doped MoO3 catalyst at room temperature
Source: Royal Society of Chemistry journal article supplement (doi:10.1039/c4dt01012d), 2014-01-01
Supplement: c4dt01012d1.pdf [file c4dt01012d1.pdf]

**Supporting Information**

**Highly efficient degradation of dye pollutants by Ce-doped  
MoO<sub>3</sub> catalyst at room temperature**

Yujian Jin, Na Li, Haiqiu Liu, Xia Hua, Qiuying Zhang, Mindong Chen\*, Fei Teng\*

*Jiangsu Engineering Technology Research Centre of Environmental Cleaning  
Materials, Jiangsu Key Laboratory of Atmospheric Environment Monitoring and  
Pollution Control, School of Environmental Science and Engineering, Nanjing  
University of Information Science & Technology, 219 Ningliu Road, Nanjing 210044,*

*China*

---

\*Corresponding author. Email: [tfwd@163.com](mailto:tfwd@163.com) (F. Teng); Phone/Fax: 0086-25-58731090

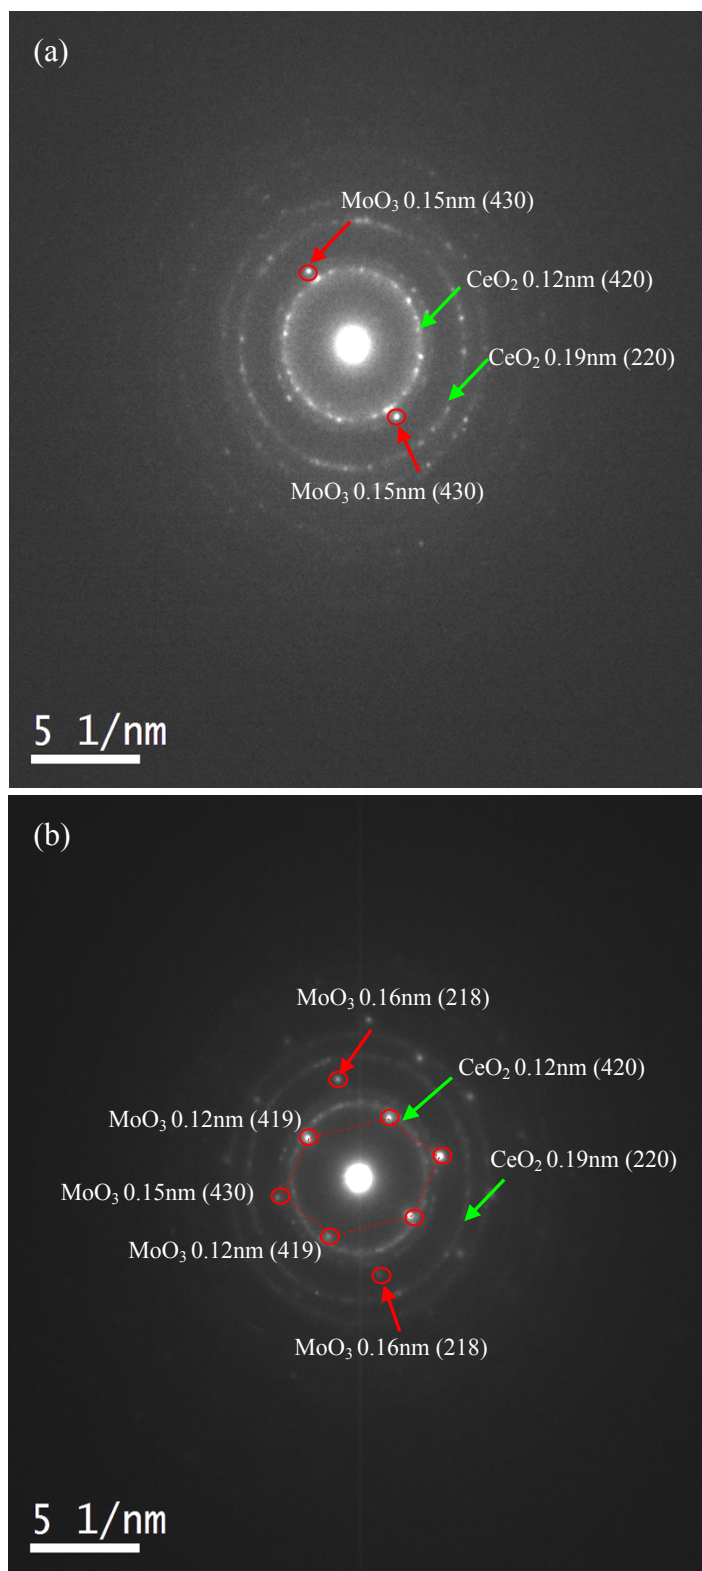

**Figure S1.** Selected area electron diffraction (SAED) patterns of the typical Ce(*x*)/MoO<sub>3</sub> samples: (a) *x*=5; (b) *x*=40

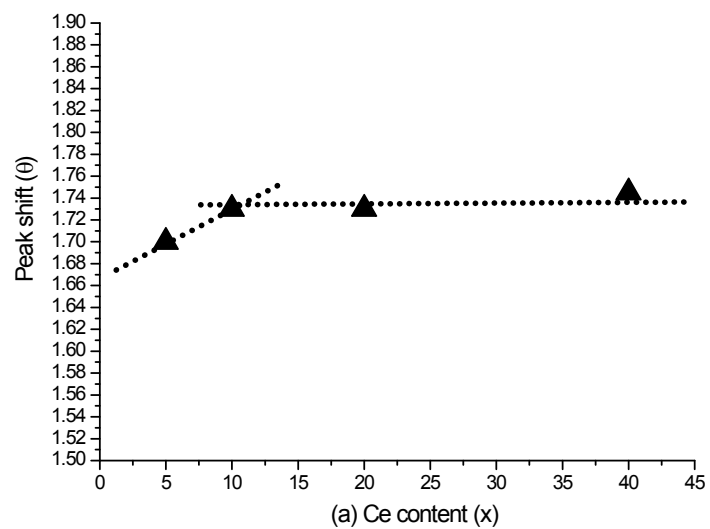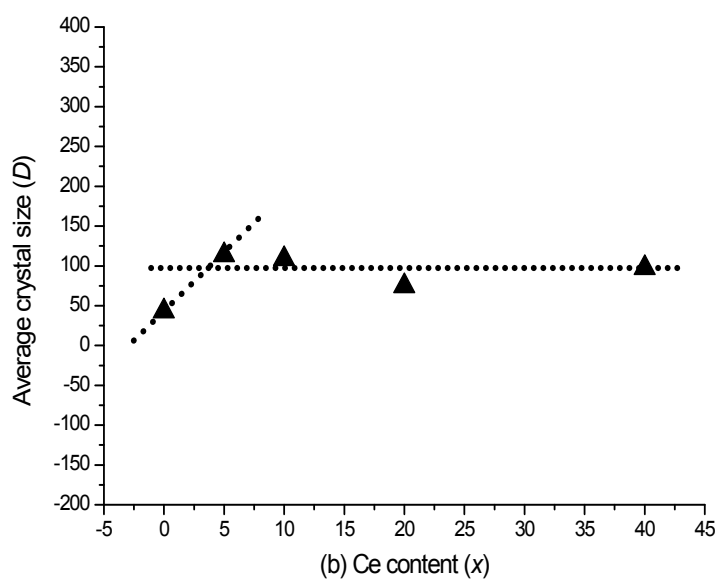

**Figure S2.** Peak shift degrees ( $\theta$ ) and average crystal sizes with the increase of  $\text{CeO}_2$

content: calculated by (210) peak at  $2\theta=25.79^\circ$

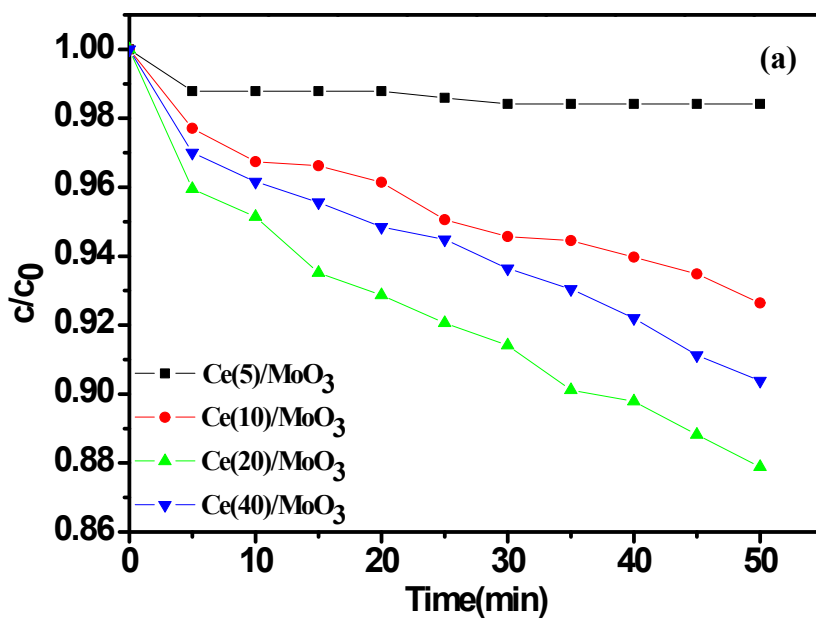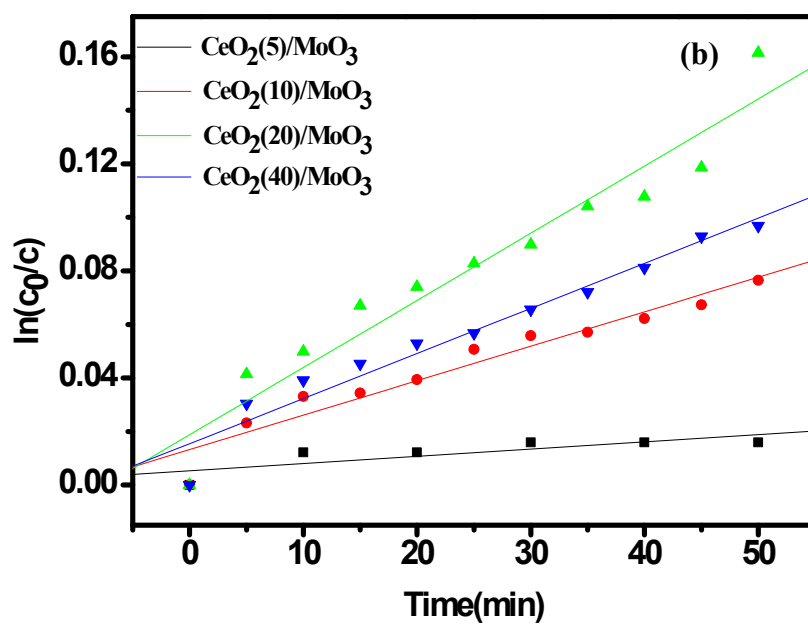

**Figure S3.** Degradation curves (a) and reaction kinetic curves of MO by Ce(x)/MoO<sub>3</sub> catalysts within 50 min at room temperature and normal atmospheric pressure: 200 mL 15 mgL<sup>-1</sup> MO aqueous solution

Table S1 Apparent reaction kinetic constants ( $k_a$ ) for the degradations of MO dye in single MO solution and MB-MO mixture dye solution by Ce(x)/MoO<sub>3</sub> catalysts

| Samples                 | $k_a$ (Single MO solution)<br>(min <sup>-1</sup> ) | $k_a$ (MO in MB-MO mixture dyes)<br>(min <sup>-1</sup> ) |
|-------------------------|----------------------------------------------------|----------------------------------------------------------|
| Ce(5)/MoO <sub>3</sub>  | $2.700 \times 10^{-4}$                             | $0.98228 \times 10^{-4}$                                 |
| Ce(10)/MoO <sub>3</sub> | $1.29 \times 10^{-3}$                              | $1.05 \times 10^{-3}$                                    |
| Ce(20)/MoO <sub>3</sub> | $2.51 \times 10^{-3}$                              | $2.33 \times 10^{-3}$                                    |
| Ce(40)/MoO <sub>3</sub> | $1.68 \times 10^{-3}$                              | $1.68 \times 10^{-3}$                                    |

After reacting for 50 min

The degradation rates follow the order as follows:

Ce(20)/MoO<sub>3</sub> > Ce(40)/MoO<sub>3</sub> > Ce(10)/MoO<sub>3</sub> > Ce(5)/MoO<sub>3</sub>

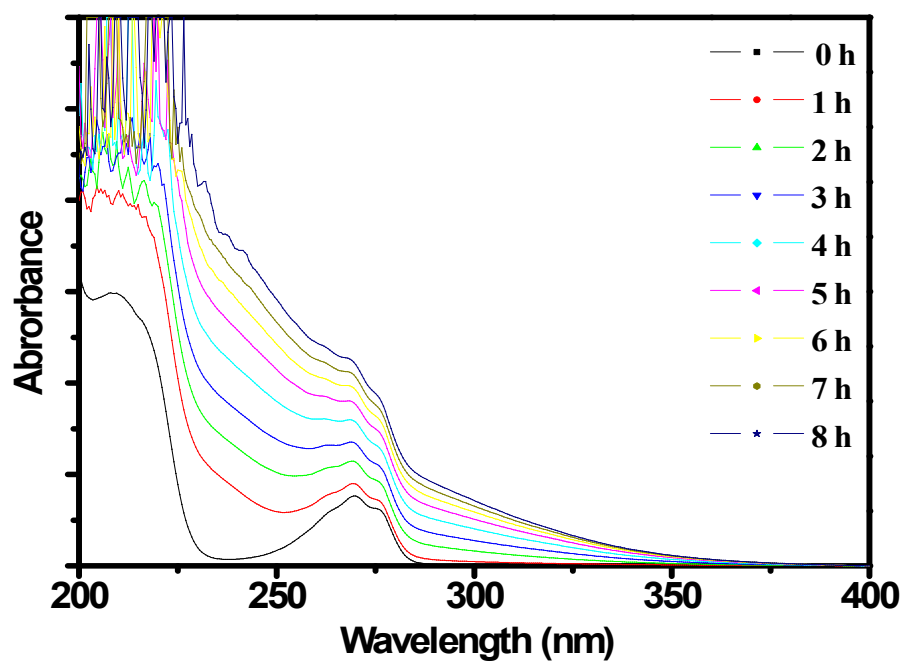

**Figure S4.** UV-vis absorption spectra of phenol solution over Ce(40)/MoO<sub>3</sub> at different reaction times: 200mL 10 mgL<sup>-1</sup> phenol in the ethanol-water solution ( $V_{\text{ethanol}}/V_{\text{water}}=2/5$ )

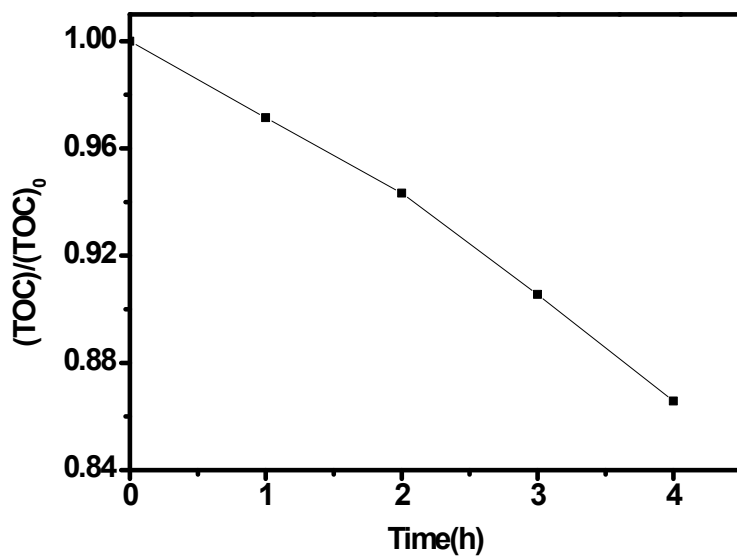

**Figure S5.** Changes of TOC during the degradation of MB over Ce(5)/MoO<sub>3</sub>

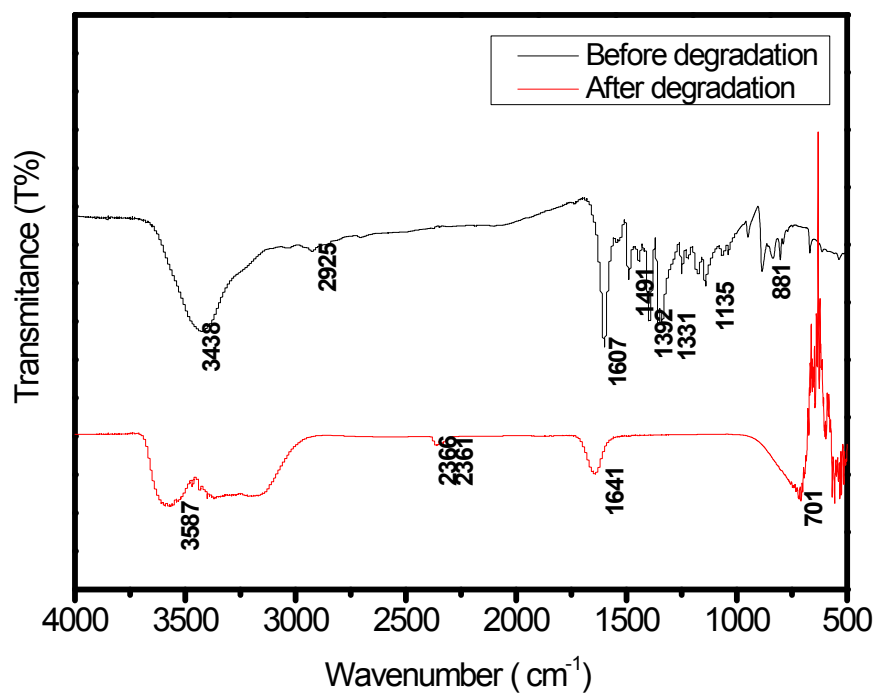

**Figure S6.** FT-IR spectra of MB before and after degradation



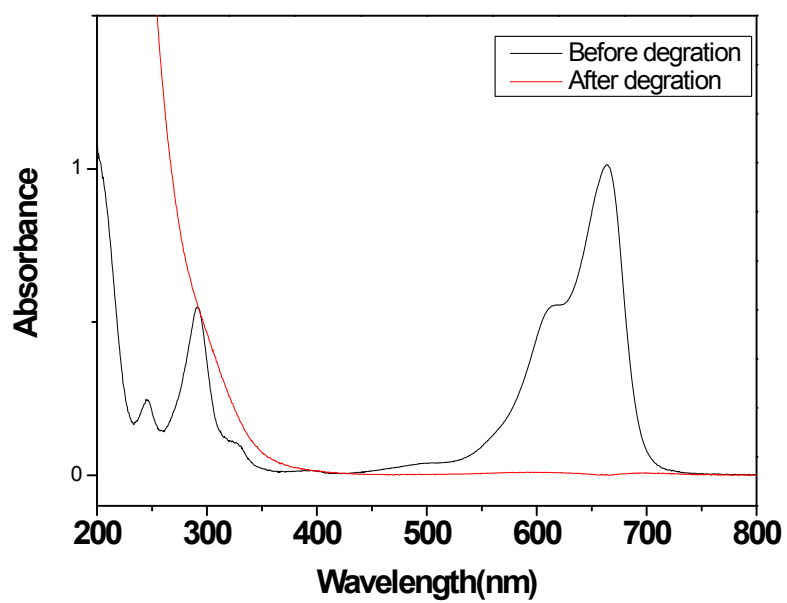

**Figure S7.** UV-vis absorption spectra of MB solution before and after degradation

B #1 RT: 0.00 AV: 1 NL: 2.81E5  
T: + p APCI Q1MS [80.070-350.100]

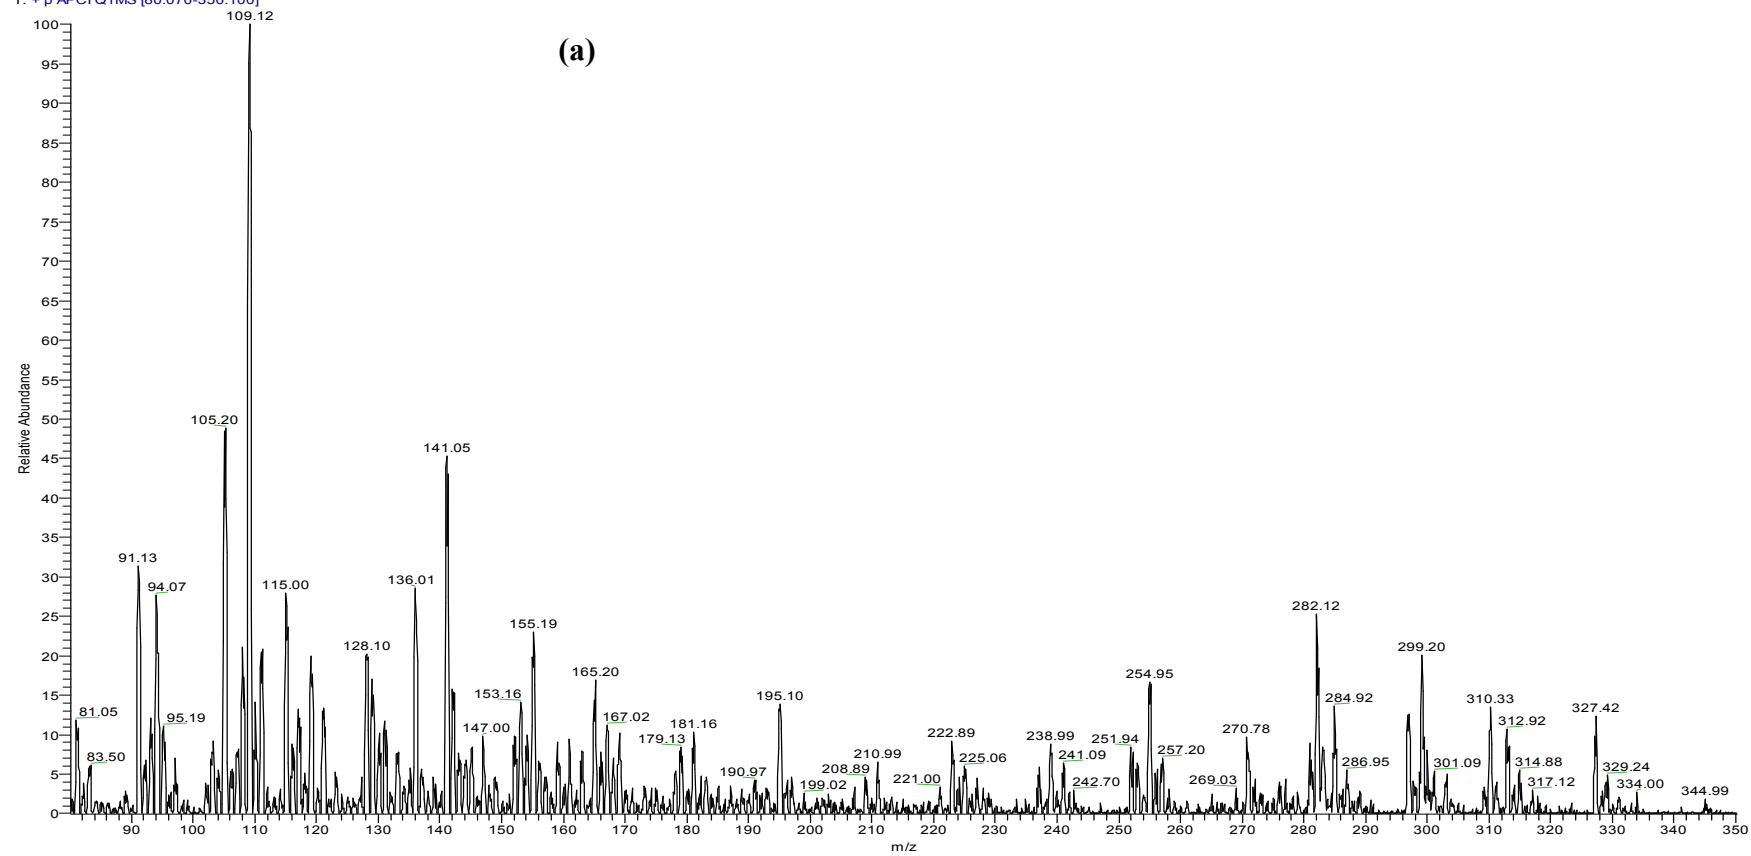

test\_140522173026 #1 RT: 0.01 AV: 1 SM: 15B NL: 1.54E5  
T: + p APCI Q1MS [80.070-350.000]

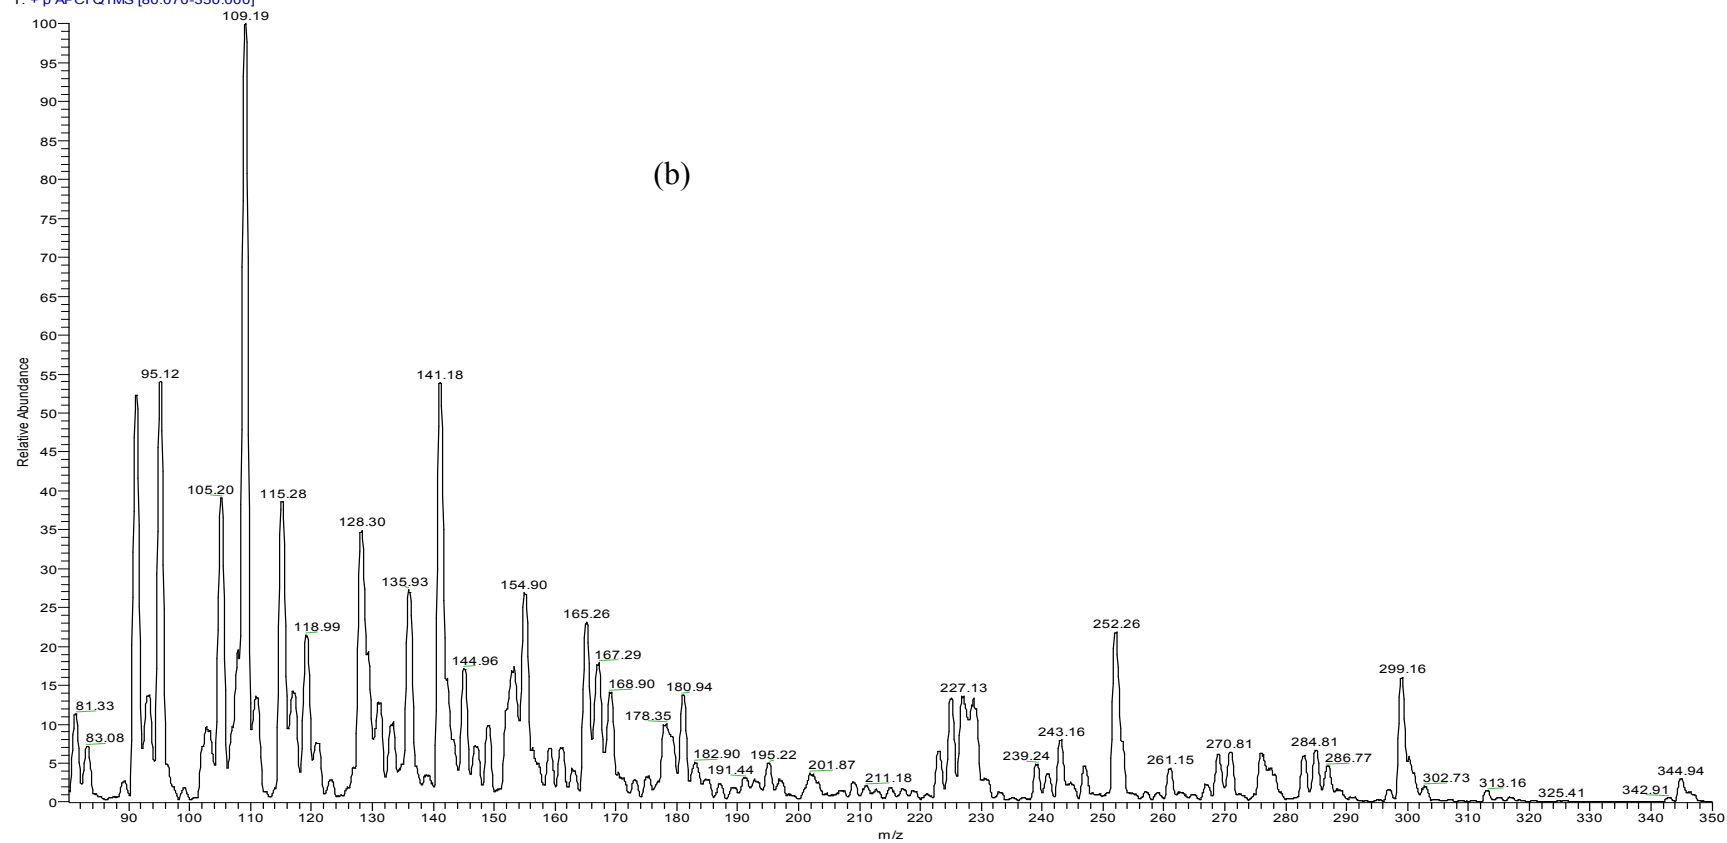

Figure S8. Mass spectra (MS) of MB: (a) background; (b) after degradation by Ce(5)/MoO<sub>3</sub>
